# Supplementary material
Source: publisher figshare collection journal article supplement (https://acs.figshare.com/ndownloader/files/5183086)
Supplement: Supplementary file 1 [file 5183086]

 
data_yama01ss 
 
_audit_creation_method            SHELXL-97 
_chemical_name_systematic 
; 
 ? 
; 
_chemical_name_common             ? 
_chemical_melting_point           ? 
_chemical_formula_moiety          ? 
_chemical_formula_sum 
 'C13 H16 N2 O' 
_chemical_formula_weight          216.28 
 
loop_ 
 _atom_type_symbol 
 _atom_type_description 
 _atom_type_scat_dispersion_real 
 _atom_type_scat_dispersion_imag 
 _atom_type_scat_source 
 'C'  'C'   0.0033   0.0016 
 'International Tables Vol C Tables 4.2.6.8 and 6.1.1.4' 
 'H'  'H'   0.0000   0.0000 
 'International Tables Vol C Tables 4.2.6.8 and 6.1.1.4' 
 'N'  'N'   0.0061   0.0033 
 'International Tables Vol C Tables 4.2.6.8 and 6.1.1.4' 
 'O'  'O'   0.0106   0.0060 
 'International Tables Vol C Tables 4.2.6.8 and 6.1.1.4' 
 
_symmetry_cell_setting            ? 
_symmetry_space_group_name_H-M    ? 
 
loop_ 
 _symmetry_equiv_pos_as_xyz 
 'x, y, z' 
 '-x, -y, z+1/2' 
 'x+1/2, -y+1/2, z' 
 '-x+1/2, y+1/2, z+1/2' 
 
_cell_length_a                    13.330(2) 
_cell_length_b                    7.2301(13) 
_cell_length_c                    11.752(2) 
_cell_angle_alpha                 90.00 
_cell_angle_beta                  90.00 
_cell_angle_gamma                 90.00 
_cell_volume                      1132.6(4) 
_cell_formula_units_Z             4 
_cell_measurement_temperature     100(2) 
_cell_measurement_reflns_used     ? 
_cell_measurement_theta_min       ? 
_cell_measurement_theta_max       ? 
 
_exptl_crystal_description        ? 
_exptl_crystal_colour             ? 
_exptl_crystal_size_max           ? 
_exptl_crystal_size_mid           ? 
_exptl_crystal_size_min           ? 
_exptl_crystal_density_meas       ? 
_exptl_crystal_density_diffrn     1.268 
_exptl_crystal_density_method     'not measured' 
_exptl_crystal_F_000              464 
_exptl_absorpt_coefficient_mu     0.082 
_exptl_absorpt_correction_type    ? 
_exptl_absorpt_correction_T_min   ? 
_exptl_absorpt_correction_T_max   ? 
_exptl_absorpt_process_details    ? 
 
_exptl_special_details 
; 
 ? 
; 
 
_diffrn_ambient_temperature       100(2) 
_diffrn_radiation_wavelength      0.71073 
_diffrn_radiation_type            MoK\a 
_diffrn_radiation_source          'fine-focus sealed tube' 
_diffrn_radiation_monochromator   graphite 
_diffrn_measurement_device_type   ? 
_diffrn_measurement_method        ? 
_diffrn_detector_area_resol_mean  ? 
_diffrn_standards_number          ? 
_diffrn_standards_interval_count  ? 
_diffrn_standards_interval_time   ? 
_diffrn_standards_decay_%         ? 
_diffrn_reflns_number             10231 
_diffrn_reflns_av_R_equivalents   0.0339 
_diffrn_reflns_av_sigmaI/netI     0.0197 
_diffrn_reflns_limit_h_min        -15 
_diffrn_reflns_limit_h_max        15 
_diffrn_reflns_limit_k_min        -8 
_diffrn_reflns_limit_k_max        8 
_diffrn_reflns_limit_l_min        -13 
_diffrn_reflns_limit_l_max        13 
_diffrn_reflns_theta_min          3.06 
_diffrn_reflns_theta_max          25.02 
_reflns_number_total              1994 
_reflns_number_gt                 1961 
_reflns_threshold_expression      >2sigma(I) 
 
_computing_data_collection        ? 
_computing_cell_refinement        ? 
_computing_data_reduction         ? 
_computing_structure_solution     'SHELXS-97 (Sheldrick, 1990)' 
_computing_structure_refinement   'SHELXL-97 (Sheldrick, 1997)' 
_computing_molecular_graphics     ? 
_computing_publication_material   ? 
 
_refine_special_details 
; 
 Refinement of F^2^ against ALL reflections.  The weighted R-factor wR and 
 goodness of fit S are based on F^2^, conventional R-factors R are based 
 on F, with F set to zero for negative F^2^. The threshold expression of 
 F^2^ > 2sigma(F^2^) is used only for calculating R-factors(gt) etc. and is 
 not relevant to the choice of reflections for refinement.  R-factors based 
 on F^2^ are statistically about twice as large as those based on F, and R- 
 factors based on ALL data will be even larger. 
; 
 
_refine_ls_structure_factor_coef  Fsqd  
_refine_ls_matrix_type            full 
_refine_ls_weighting_scheme       calc  
_refine_ls_weighting_details 
 'calc w=1/[\s^2^(Fo^2^)+(0.0699P)^2^+0.0919P] where P=(Fo^2^+2Fc^2^)/3' 
_atom_sites_solution_primary      direct 
_atom_sites_solution_secondary    difmap 
_atom_sites_solution_hydrogens    geom 
_refine_ls_hydrogen_treatment     mixed 
_refine_ls_extinction_method      none 
_refine_ls_extinction_coef        ? 
_refine_ls_abs_structure_details 
 'Flack H D (1983), Acta Cryst. A39, 876-881' 
_refine_ls_abs_structure_Flack    0.3(11) 
_refine_ls_number_reflns          1994 
_refine_ls_number_parameters      147 
_refine_ls_number_restraints      1 
_refine_ls_R_factor_all           0.0311 
_refine_ls_R_factor_gt            0.0307 
_refine_ls_wR_factor_ref          0.0835 
_refine_ls_wR_factor_gt           0.0828 
_refine_ls_goodness_of_fit_ref    0.969 
_refine_ls_restrained_S_all       0.969 
_refine_ls_shift/su_max           0.001 
_refine_ls_shift/su_mean          0.000 
 
loop_ 
 _atom_site_label 
 _atom_site_type_symbol 
 _atom_site_fract_x 
 _atom_site_fract_y 
 _atom_site_fract_z 
 _atom_site_U_iso_or_equiv 
 _atom_site_adp_type 
 _atom_site_occupancy 
 _atom_site_symmetry_multiplicity 
 _atom_site_calc_flag 
 _atom_site_refinement_flags 
 _atom_site_disorder_assembly 
 _atom_site_disorder_group 
C1 C 0.12082(10) -0.06525(17) 0.72731(12) 0.0172(3) Uani 1 1 d . . . 
C2 C 0.16170(10) -0.12312(18) 0.62355(12) 0.0203(3) Uani 1 1 d . . . 
H2 H 0.1236 -0.1190 0.5553 0.024 Uiso 1 1 calc R . . 
C3 C 0.25932(10) -0.18642(18) 0.62398(12) 0.0211(3) Uani 1 1 d . . . 
H3 H 0.2899 -0.2259 0.5551 0.025 Uiso 1 1 calc R . . 
C4 C 0.31271(11) -0.19232(17) 0.72518(12) 0.0204(3) Uani 1 1 d . . . 
H4 H 0.3800 -0.2356 0.7267 0.024 Uiso 1 1 calc R . . 
C5 C 0.26585(10) -0.13375(17) 0.82422(12) 0.0190(3) Uani 1 1 d . . . 
C6 C 0.31854(11) -0.1429(2) 0.93706(13) 0.0246(3) Uani 1 1 d . . . 
H6A H 0.3073 -0.0275 0.9789 0.037 Uiso 1 1 calc R . . 
H6B H 0.3906 -0.1602 0.9247 0.037 Uiso 1 1 calc R . . 
H6C H 0.2921 -0.2470 0.9812 0.037 Uiso 1 1 calc R . . 
C7 C -0.00770(9) 0.13862(18) 0.81348(12) 0.0180(3) Uani 1 1 d . . . 
H7 H 0.0198 0.1163 0.8914 0.022 Uiso 1 1 calc R . . 
C8 C -0.12266(10) 0.14958(17) 0.81622(12) 0.0187(3) Uani 1 1 d . . . 
H8A H -0.1442 0.2507 0.8676 0.022 Uiso 1 1 calc R . . 
H8B H -0.1507 0.0320 0.8454 0.022 Uiso 1 1 calc R . . 
C9 C -0.16180(11) 0.18622(19) 0.69441(12) 0.0202(3) Uani 1 1 d . . . 
H9A H -0.2063 0.0843 0.6696 0.024 Uiso 1 1 calc R . . 
H9B H -0.2002 0.3034 0.6920 0.024 Uiso 1 1 calc R . . 
C10 C -0.06996(9) 0.19849(19) 0.61668(12) 0.0216(3) Uani 1 1 d . . . 
H10 H -0.0911 0.2259 0.5368 0.026 Uiso 1 1 calc R . . 
C11 C 0.00005(11) 0.34475(18) 0.65879(13) 0.0219(3) Uani 1 1 d . . . 
H11 H 0.0191 0.4486 0.6143 0.026 Uiso 1 1 calc R . . 
C12 C 0.03329(10) 0.31656(19) 0.76418(13) 0.0205(3) Uani 1 1 d . . . 
C13 C 0.10293(10) 0.4351(2) 0.83124(13) 0.0261(3) Uani 1 1 d . . . 
H13A H 0.1196 0.5461 0.7873 0.039 Uiso 1 1 calc R . . 
H13B H 0.1644 0.3659 0.8478 0.039 Uiso 1 1 calc R . . 
H13C H 0.0706 0.4712 0.9028 0.039 Uiso 1 1 calc R . . 
N1 N 0.01837(8) -0.01646(15) 0.73573(10) 0.0176(3) Uani 1 1 d . . . 
N2 N 0.17068(8) -0.06970(15) 0.82591(10) 0.0179(2) Uani 1 1 d . . . 
O1 O -0.02094(7) 0.01753(14) 0.62247(9) 0.0222(2) Uani 1 1 d . . . 
 
loop_ 
 _atom_site_aniso_label 
 _atom_site_aniso_U_11 
 _atom_site_aniso_U_22 
 _atom_site_aniso_U_33 
 _atom_site_aniso_U_23 
 _atom_site_aniso_U_13 
 _atom_site_aniso_U_12 
C1 0.0151(6) 0.0153(6) 0.0212(6) 0.0020(5) 0.0002(5) -0.0025(5) 
C2 0.0215(7) 0.0222(7) 0.0173(7) 0.0003(5) -0.0005(5) -0.0010(5) 
C3 0.0230(7) 0.0208(6) 0.0194(7) -0.0008(5) 0.0055(6) 0.0007(5) 
C4 0.0162(7) 0.0201(6) 0.0249(7) 0.0011(6) 0.0024(6) 0.0007(5) 
C5 0.0174(6) 0.0168(6) 0.0226(7) 0.0010(5) 0.0001(6) -0.0010(5) 
C6 0.0192(7) 0.0306(8) 0.0240(8) -0.0005(6) -0.0022(6) 0.0037(5) 
C7 0.0156(6) 0.0219(7) 0.0164(6) -0.0014(5) -0.0003(5) 0.0012(5) 
C8 0.0151(6) 0.0212(6) 0.0197(7) 0.0009(5) 0.0008(6) 0.0013(5) 
C9 0.0167(7) 0.0232(7) 0.0205(7) 0.0001(5) -0.0009(6) 0.0001(5) 
C10 0.0193(7) 0.0272(7) 0.0182(7) 0.0029(6) -0.0005(6) 0.0040(5) 
C11 0.0189(7) 0.0237(7) 0.0232(8) 0.0049(6) 0.0045(5) 0.0029(5) 
C12 0.0134(7) 0.0229(7) 0.0252(7) -0.0036(5) 0.0024(5) 0.0024(5) 
C13 0.0196(6) 0.0284(7) 0.0304(8) -0.0038(6) 0.0009(6) -0.0031(6) 
N1 0.0153(6) 0.0227(6) 0.0149(6) -0.0004(4) -0.0016(4) 0.0012(4) 
N2 0.0155(5) 0.0182(6) 0.0200(6) 0.0011(5) -0.0001(5) 0.0007(4) 
O1 0.0216(5) 0.0292(5) 0.0157(5) -0.0025(4) -0.0060(4) 0.0045(4) 
 
_geom_special_details 
; 
 All esds (except the esd in the dihedral angle between two l.s. planes) 
 are estimated using the full covariance matrix.  The cell esds are taken 
 into account individually in the estimation of esds in distances, angles 
 and torsion angles; correlations between esds in cell parameters are only 
 used when they are defined by crystal symmetry.  An approximate (isotropic) 
 treatment of cell esds is used for estimating esds involving l.s. planes. 
; 
 
loop_ 
 _geom_bond_atom_site_label_1 
 _geom_bond_atom_site_label_2 
 _geom_bond_distance 
 _geom_bond_site_symmetry_2 
 _geom_bond_publ_flag 
C1 N2 1.3363(18) . ? 
C1 C2 1.3995(19) . ? 
C1 N1 1.4140(17) . ? 
C2 C3 1.379(2) . ? 
C3 C4 1.387(2) . ? 
C4 C5 1.387(2) . ? 
C5 N2 1.3506(17) . ? 
C5 C6 1.502(2) . ? 
C7 N1 1.4876(18) . ? 
C7 C12 1.5130(19) . ? 
C7 C8 1.5348(17) . ? 
C8 C9 1.5465(19) . ? 
C9 C10 1.5300(18) . ? 
C10 O1 1.4640(16) . ? 
C10 C11 1.495(2) . ? 
C11 C12 1.331(2) . ? 
C12 C13 1.489(2) . ? 
N1 O1 1.4515(15) . ? 
 
loop_ 
 _geom_angle_atom_site_label_1 
 _geom_angle_atom_site_label_2 
 _geom_angle_atom_site_label_3 
 _geom_angle 
 _geom_angle_site_symmetry_1 
 _geom_angle_site_symmetry_3 
 _geom_angle_publ_flag 
N2 C1 C2 123.69(12) . . ? 
N2 C1 N1 115.19(12) . . ? 
C2 C1 N1 120.77(12) . . ? 
C3 C2 C1 117.60(13) . . ? 
C2 C3 C4 119.83(13) . . ? 
C3 C4 C5 118.63(13) . . ? 
N2 C5 C4 122.68(13) . . ? 
N2 C5 C6 116.18(12) . . ? 
C4 C5 C6 121.12(12) . . ? 
N1 C7 C12 108.74(11) . . ? 
N1 C7 C8 106.57(11) . . ? 
C12 C7 C8 108.95(11) . . ? 
C7 C8 C9 109.03(11) . . ? 
C10 C9 C8 107.02(11) . . ? 
O1 C10 C11 109.77(10) . . ? 
O1 C10 C9 106.11(11) . . ? 
C11 C10 C9 110.05(12) . . ? 
C12 C11 C10 114.06(12) . . ? 
C11 C12 C13 127.73(14) . . ? 
C11 C12 C7 111.48(12) . . ? 
C13 C12 C7 120.78(13) . . ? 
C1 N1 O1 109.07(10) . . ? 
C1 N1 C7 117.17(10) . . ? 
O1 N1 C7 110.57(9) . . ? 
C1 N2 C5 117.56(12) . . ? 
N1 O1 C10 110.80(9) . . ? 
 
loop_ 
 _geom_torsion_atom_site_label_1 
 _geom_torsion_atom_site_label_2 
 _geom_torsion_atom_site_label_3 
 _geom_torsion_atom_site_label_4 
 _geom_torsion 
 _geom_torsion_site_symmetry_1 
 _geom_torsion_site_symmetry_2 
 _geom_torsion_site_symmetry_3 
 _geom_torsion_site_symmetry_4 
 _geom_torsion_publ_flag 
N2 C1 C2 C3 -0.63(19) . . . . ? 
N1 C1 C2 C3 -173.55(12) . . . . ? 
C1 C2 C3 C4 0.57(18) . . . . ? 
C2 C3 C4 C5 0.01(18) . . . . ? 
C3 C4 C5 N2 -0.60(19) . . . . ? 
C3 C4 C5 C6 177.90(12) . . . . ? 
N1 C7 C8 C9 -59.96(13) . . . . ? 
C12 C7 C8 C9 57.21(14) . . . . ? 
C7 C8 C9 C10 -0.22(14) . . . . ? 
C8 C9 C10 O1 62.24(13) . . . . ? 
C8 C9 C10 C11 -56.46(14) . . . . ? 
O1 C10 C11 C12 -57.12(16) . . . . ? 
C9 C10 C11 C12 59.31(16) . . . . ? 
C10 C11 C12 C13 -179.67(14) . . . . ? 
C10 C11 C12 C7 1.17(17) . . . . ? 
N1 C7 C12 C11 55.75(14) . . . . ? 
C8 C7 C12 C11 -60.03(15) . . . . ? 
N1 C7 C12 C13 -123.48(14) . . . . ? 
C8 C7 C12 C13 120.74(14) . . . . ? 
N2 C1 N1 O1 169.12(10) . . . . ? 
C2 C1 N1 O1 -17.39(15) . . . . ? 
N2 C1 N1 C7 42.59(16) . . . . ? 
C2 C1 N1 C7 -143.92(12) . . . . ? 
C12 C7 N1 C1 68.39(14) . . . . ? 
C8 C7 N1 C1 -174.31(11) . . . . ? 
C12 C7 N1 O1 -57.40(12) . . . . ? 
C8 C7 N1 O1 59.90(12) . . . . ? 
C2 C1 N2 C5 0.08(18) . . . . ? 
N1 C1 N2 C5 173.35(11) . . . . ? 
C4 C5 N2 C1 0.55(18) . . . . ? 
C6 C5 N2 C1 -178.01(11) . . . . ? 
C1 N1 O1 C10 -127.25(11) . . . . ? 
C7 N1 O1 C10 2.98(12) . . . . ? 
C11 C10 O1 N1 53.01(13) . . . . ? 
C9 C10 O1 N1 -65.88(12) . . . . ? 
 
_diffrn_measured_fraction_theta_max    0.999 
_diffrn_reflns_theta_full              25.02 
_diffrn_measured_fraction_theta_full   0.999 
_refine_diff_density_max    0.182 
_refine_diff_density_min   -0.183 
_refine_diff_density_rms    0.043 
